# Supplementary material for: Prediction value of IVIM Combining with BOLD-MRI in Diabetic Kidney Disease: A Prospective Cohort Study
Source: Research Square preprint supplement (doi:10.21203/rs.3.rs-122314/v1), 2020-12-23
Supplement: Supplementary file 1 [file 74de30f3b53961822e1eb962.docx]

**Supplemental table** **5. IQR groups of fMRI values**

| MR2* (s-1) | n | CD (mm2/s) | n | group |
| --- | --- | --- | --- | --- |
| 16-23 | 16 | 54-44 | 14 | 1 |
| 24-26 | 18 | 43-40 | 17 | 2 |
| 27-29 | 17 | 39-33 | 15 | 3 |
| 30-40 | 9 | 32-23 | 14 | 4 |

CD, cortical D value; fMRI, functional Magnetic resonance imaging; IQR, Interquartile range; MR2*, medullary R2* value.
